# Supplementary material for: Acid-activation enhanced graphite additive manufactured polypropylene sensor for the detection of parathion in forensic and environmental samples
Source: Royal Society of Chemistry journal article supplement (doi:10.1039/d5sd00125k), 2026-01-01
Supplement: d5sd00125k1.pdf [file d5sd00125k1.pdf]

Supporting Information for:

Acid-activation enhanced graphite additive manufactured polypropylene sensor for the detection of parathion in forensic and environmental samples

Karen K. L. Augustoa,b+, Larissa M. A. Melo,c+, Elena Bernaltea, Robert D. Crapnella, Rodrigo A. A. Muñozd, Orlando Fatibello-Filhob, Wallans T. P. dos Santos,e, and Craig E. Banksa\*

aFaculty of Science and Engineering, Manchester Metropolitan University, Dalton Building, Chester Street, M1 5GD, Great Britain.

bDepartment of Chemistry, Federal University of São Carlos, 13560-970, São Carlos, São Paulo, Brazil

cDepartment of Chemistry, Federal University of Vales do Jequitinhonha and Mucuri, Campus JK, 39100000, Diamantina, Minas Gerais, Brazil

dInstitute of Chemistry, Federal University of Uberlândia, 38400-902, Uberlândia, Minas Gerais, Brazil.

eDepartment of Pharmacy, Federal University of Vales do Jequitinhonha and Mucuri, Campus JK, 39100000, Diamantina, Minas Gerais, Brazil

+These authors contributed equally to the work

\*To whom correspondence should be addressed.

E-mail: c.banks@mmu.ac.uk; Tel: +44(0)1612471196

Figure S1. XPS C 1s spectra for (A) the graphite powder and (B) Gr(HNO<sub>3</sub>) powder, and XPS O 1s spectra for (C) graphite powder and (D) Gr(HNO<sub>3</sub>) powder.

Table S1. The atomic concentration of the species in each graphite powder

| Material              | %    |          |      |       |
|-----------------------|------|----------|------|-------|
|                       | C=C  | C—C, C—H | C—O  | O—C=O |
| Graphite              | 43.7 | 15.3     | 24.7 | 16.4  |
| Gr(HNO <sub>3</sub> ) | 59.0 | 6.2      | 11.7 | 23.1  |

Figure S2. Scan rate study (5–500 mV s<sup>−1</sup>) (A) in [Ru(NH<sub>3</sub>)<sub>6</sub>]<sup>3+</sup> (1 mM in 0.1 M KCl) and (B) in [Fe(CN)<sub>6</sub>]<sup>4−/3−</sup> (1 mM in 0.1 M KCl) performed with the CB-Graphite/PP as the WE and (C) scan rate study (5–500 mV s<sup>−1</sup>) in [Fe(CN)<sub>6</sub>]<sup>4−/3−</sup> with the CB-Gr(HNO<sub>3</sub>)/PP as the WE.

Figure S3. Cyclic Voltammograms in 100 μM parathion and 0.1 M BR buffer solution at different pHs (2.0 – 12.0) at CB-Gr(HNO<sub>3</sub>)/PP electrode. Scan rate: 50 mV s<sup>−1</sup>.

Figure S4. Cyclic voltammetry towards 100 μM parathion in 0.1 M BR buffer solution at different pHs: (A) 2.0, (B) 3.0, (C) 4.0, (D) 5.0, (E) 6.0, and (F) 7.0, at CB-Gr(HNO<sub>3</sub>)/PP electrode. Scan rate: 50 mV s<sup>−1</sup>. In the graphs: O1: quasi-reversible oxidation process and R1: irreversible reduction process

Figure S5. Plots of (A) E<sub>p</sub> vs pH and (B) I<sub>p</sub> vs pH for 100 μM parathion in 0.1 M BR buffer solution at different pHs (2.0 – 7.0).

Table S2. Linear relationship between  $E_p$  and pH for parathion processes

| Process | pH        | Linear range                                                               | $R^2$ |
|---------|-----------|----------------------------------------------------------------------------|-------|
| O1      | 2.0 – 7.0 | $E_p \text{ (V)} = + 0.43 (\pm 0.02) - 0.052 (\pm 0.004) \times \text{pH}$ | 0.98  |
| R1      | 2.0 – 4.0 | $E_p \text{ (V)} = - 0.52 (\pm 0.02) - 0.038 (\pm 0.007) \times \text{pH}$ | 0.97  |

Figure S6. (A) Cyclic voltammetry for the supporting electrolyte study using H<sub>2</sub>SO<sub>4</sub> (black line), HNO<sub>3</sub> (blue line), HCl (red line), and BR buffer (magenta line) all at 0.1 M with 100  $\mu$ M parathion performed at CB-Gr (HNO<sub>3</sub>)/PP electrode. (B) Cyclic voltammetry for the ionic strength study using HNO<sub>3</sub> as the supporting electrolyte: 0.05 (black line), 0.1 (blue line), and 0.2 (red line) M. Scan rate: 50 mV s<sup>-1</sup>.

Figure S7. (A) Cyclic voltammetry for different scan rates (5 – 500 mV s<sup>-1</sup>) with 100  $\mu$ M parathion in 0.1 M HNO<sub>3</sub> at CB-Gr(HNO<sub>3</sub>)/PP. Plots (B)  $I_p$  vs  $v^{1/2}$ , (C)  $\log I_p$  vs  $\log v$ , and (D)  $I_p$  vs  $v$ .

Scheme S1. Proposed electrochemical redox mechanism of the parathion using a CB-Gr(HNO<sub>3</sub>)/PP -Gr electrode in 0.1 M HNO<sub>3</sub>.

Figure S8. SWAdSV voltammograms obtained for 0.1 M HNO<sub>3</sub> with 100  $\mu$ M parathion using at CB-Gr(HNO<sub>3</sub>)/PP electrodes as WE. All measurements were performed using the optimised conditions. The pre-accumulation time ranged from 0 to 1 min. The inset shows a plot of  $I_p$  vs. pre-accumulation times.

Figure S9. SWAdSV voltammograms obtained for 0.1 M HNO<sub>3</sub> before (black line) and after addition of 30 to 90  $\mu$ M parathion at CB-Graphite/PP. The inset shows linear regression. All measurements were performed in triplicate using the optimised conditions.

Table S3. Linear regression equations and R<sup>2</sup> values of the plots of I<sub>p</sub> vs. [parathion]

| Electrode                   | Linear range ( $\mu$ M) | Linear regression equation                                                            | R <sup>2</sup> |
|-----------------------------|-------------------------|---------------------------------------------------------------------------------------|----------------|
| CB-Graphite/PP              | 40 – 90                 | $I_p (\mu A) = 2.10 (\pm 0.06) + 0.008 (\pm 0.001) \times [\text{parathion}] (\mu M)$ | 0.947          |
| CB-Gr(HNO <sub>3</sub> )/PP | 20 – 100                | $I_p (\mu A) = 6.18 (\pm 0.07) + 0.023 (\pm 0.001) \times [\text{parathion}] (\mu M)$ | 0.993          |

Table S4. Comparison between the CB-Gr(HNO<sub>3</sub>)/PP additive manufactured electrodes developed in this work and previously reported sensors for parathion detection

| Electrode                | Technique   | Sample                              | Linear range ( $\mu$ M) | LOD (nM) | Ref |
|--------------------------|-------------|-------------------------------------|-------------------------|----------|-----|
| FeV/RGO@GCE              | Amperometry | Green beans and river samples       | 0.001–260               | 0.7      | 1   |
| MoC/SPCE                 | DPV         | Water samples                       | 0.02–43                 | 4        | 2   |
| Ag@GNRs/SPCE             | Amperometry | Vegetables and fruits               | 0.005–2780              | 0.5      | 3   |
| Nd-UiO-66@MWCNT/GCE      | DPV         | Water, fruit and vegetable samples  | 0.001–0.120             | 0.07     | 4   |
| SnS <sub>2</sub> /NS–RGO | Amperometry | River water and black grape samples | 0.001–176               | 0.17     | 5   |

|                              |     |                             |           |     |
|------------------------------|-----|-----------------------------|-----------|-----|
| Additive manufactured CB/PLA | SWV | Honey and tap water samples | 0.85–19.6 | 200 |
| 6                            |     |                             |           |     |

|                   |            |                             |                           |
|-------------------|------------|-----------------------------|---------------------------|
| Au NPs/Nafion/GCE | SW-Ads CSV | Environmental water samples | 0.00199–0.9 and 1.07–10.7 |
| 0.606             | 7          |                             |                           |

|        |     |                                   |           |     |   |
|--------|-----|-----------------------------------|-----------|-----|---|
| FT@CNT | DPV | Tomatoes, apples and soil samples | 0.02–6.50 | 5.3 | 8 |
|--------|-----|-----------------------------------|-----------|-----|---|

|                  |     |                                       |           |
|------------------|-----|---------------------------------------|-----------|
| AgNPs@GO/IL@SPCE | SWV | Groundwater and surface water samples | 0.025–200 |
| 9                | 9   |                                       |           |

|               |     |                                                    |         |
|---------------|-----|----------------------------------------------------|---------|
| GCE/ZnOHS/MIP | DPV | Fresh green beans, strawberry, tomato, and cabbage | 5–10000 |
| 0.5           | 10  |                                                    |         |

|              |     |                            |           |    |    |
|--------------|-----|----------------------------|-----------|----|----|
| GDY-CNTs/GCE | DPV | Tap water and food samples | 0.09–64.6 | 50 | 11 |
|--------------|-----|----------------------------|-----------|----|----|

|                                                              |        |                                             |        |      |           |
|--------------------------------------------------------------|--------|---------------------------------------------|--------|------|-----------|
| CB-Gr(HNO <sub>3</sub> )/PP additive manufactured electrodes | SWAdSV | River water and synthetic biological fluids | 20–100 | 0.17 | This work |
|--------------------------------------------------------------|--------|---------------------------------------------|--------|------|-----------|

Key: FeV/RGO@GCE: glassy carbon electrode modified with FeVO<sub>4</sub>/reduced graphene oxide; MoC/SPCE: screen-printed carbon electrode based on molybdenum carbide; Ag@GNRs/SPCE: silver particles supported graphene nanoribbons modified screen-printed carbon electrode; Nd-UiO-66@MWCNT/GCE: glassy carbon electrode modified with a composite comprising neodymium (Nd) incorporated into the UiO-66 metal–organic framework and further integrated with multi-walled carbon nanotubes (MWCNTs); SnS<sub>2</sub>/NS–RGO: SnS<sub>2</sub> nanosheets supported in a N, S-co-doped reduced graphene oxide nanocomposite; Au NPs/Nafion/GCE: gold nanoparticles (AuNPs) functionalised Nafion nanocomposite modified glassy carbon electrode; SW-Ads CSV: square wave- adsorptive cathodic stripping voltammetry; FT@CNT: hybrid ferrocene-thiophene modified by carbon nanotube; AgNPs@GO/IL@SPCE: silver nanoparticles (AgNPs) in conjunction with graphene oxide/ionic liquid (GO/IL) on screen printed electrodes. GCE/ZnOHS/MIP: glassy carbon electrode functionalized with zinc oxide (ZnO) hollow spheres (ZnOHS) and a molecularly imprinted polymer (MIP); GDY-CNTs/GCE: glassy carbon electrode modified with graphdiyne (GDY)-carbon nanotubes (CNTs) nanocomposite.

Estimation of real surface area of the CB-Graphite/PP and CB-Gr(HNO<sub>3</sub>)/PP

The adsorption of parathion at CB-Graphite/PP and CB-Gr(HNO<sub>3</sub>)/PP electrodes was characterised by applying the Langmuir isothermal to the data in Figures 5 and S9, according to Equation (1):

$$\theta = (K \times [C]) / (1 + K \times [C]) \quad (1)$$

Where  $\theta$  is the fractional occupancy of the adsorption sites,  $K$  is the equilibrium constant for adsorption, and  $[C]$  is the concentration of parathion. The Langmuir plot is shown in Figure S10, where a linear regression of  $1/Q (\mu C^{-1}) = 0.827 (\pm 0.02) + 8.085 (\pm 0.1) \times 1/[\text{parathion}] (\mu M)^{-1}$  was obtained with  $R^2$  of 0.967 for CB-Graphite/PP and  $1/Q (\mu C^{-1}) = 0.325 (\pm 0.05) + 1.665 (\pm 0.2) \times 1/[\text{parathion}] (\mu M)^{-1}$  ( $R^2 = 0.968$ ) for CB-Gr(HNO<sub>3</sub>)/PP.

Figure S10. Langmuir plot of 20 – 100  $\mu M$  parathion obtained from peak area shown in Figures 6 and S6.

The rectangular box model illustrated in Scheme S1 was employed to estimate the surface area available for parathion adsorption on the working electrode, composed of graphite and carbon black. The side lengths were calculated using trigonometric methods based on bond lengths, bond angles, and Van der Waals radii of terminal atoms, determined with ChemSketch software. Scheme 1 presents possible adsorption orientations for parathion on the electrode surface, shown in plane view (A), edge view (B), and end view (C).

Scheme S1. Rectangular box model of parathion molecule for (A) flat, (B) edgewise and (C) endwise view. An empty rectangular section was included for layout symmetry of rectangular box.

Based on these calculations, the areas of the three sides of the rectangular box were determined to be  $8.315 \times 10^{-15}$ ,  $5.932 \times 10^{-15}$ , and  $5.778 \times 10^{-15}$  cm<sup>2</sup>, corresponding to  $1.203 \times 10^{14}$ ,  $1.686 \times 10^{14}$ , and  $1.731 \times 10^{14}$  molecules per cm<sup>2</sup> for the plane, edge, and end views, respectively. Using the fundamental electron charge of  $1.602 \times 10^{-19}$  C and the  $Q_{\text{max}}$  values obtained ( $1.21 \mu C$  for CB-Graphite/PP and  $3.08 \mu C$  for CB-Gr(HNO<sub>3</sub>)/PP), the number of molecules adsorbed on the electrode was calculated to be  $3.02 \times 10^{13}$  for CB-Graphite/PP and  $7.69 \times 10^{13}$  for CB-Gr(HNO<sub>3</sub>)/PP. Assuming a monolayer with close packing, the real surface area available for adsorption on the carbon black and graphite layers of the electrodes was estimated to be between 0.445 and 0.639 cm<sup>2</sup> for CB-Gr(HNO<sub>3</sub>)/PP. This value is significantly

larger than the area estimated for CB-Graphite/PP, between 0.175 and 0.251 cm<sup>2</sup>, corroborating the higher sensitivity of CB-Gr(HNO<sub>3</sub>)/PP for parathion detection.

## References

1. A. Alsulami, Y. K. Kumarswamy, M. K. Prashanth, S. Hamzada, P. Lakshminarayana, C. B. Pradeep Kumar, B.-H. Jeon and M. S. Raghu, *ACS Omega*, 2022, 7, 45239-45252.
2. T. Kokulnathan, T.-J. Wang and F. Ahmed, *Journal of Environmental Chemical Engineering*, 2021, 9, 106537.
3. M. Govindasamy, V. Mani, S.-M. Chen, T.-W. Chen and A. K. Sundramoorthy, *Scientific Reports*, 2017, 7, 46471.
4. H. Khoshsafar, N. Karimian, T. A. Nguyen, H. Fakhri, A. Khanmohammadi, A. Hajian and H. Bagheri, *Chemosphere*, 2022, 292, 133440.
5. R. Shanmugam, S. Manavalan, S.-M. Chen, M. Keerthi and L.-H. Lin, *ACS Sustainable Chemistry & Engineering*, 2020, 8, 11194-11203.
6. B. C. Janegitz, R. D. Crapnell, P. Roberto de Oliveira, C. Kalinke, M. J. Whittingham, A. Garcia-Miranda Ferrari and C. E. Banks, *ACS Measurement Science Au*, 2023, 3, 217-225.
7. H. Alwael, S. H. Al-Sedran, M. Oubaha, N. A. A. Asiri, A. S. Bashammakh, A. S. Alharthy, N. A. Albassami, T. N. Abduljabbar, G. I. Mohammed, H. M. Nassef, E. A. Bahaidarah, B. G. Alhogbi and M. S. El-Shahawi, *Journal of Food Composition and Analysis*, 2023, 124, 105649.
8. S. O. Tümay, A. Şenocak, E. Sarı, V. Şanko, M. Durmuş and E. Demirbas, *Sensors and Actuators B: Chemical*, 2021, 345, 130344.
9. S. Weheabby, Z. Liu, I. A. Pašti, V. Rajić, M. Vidotti and O. Kanoun, *Nanoscale Advances*, 2025, 7, 2195-2208.
10. M. Daizy, M. R. Ali, M. S. Bacchu, M. A. S. Aly and M. Z. H. Khan, *Environmental Technology & Innovation*, 2021, 24, 101847.
11. Y. Xue, X. Wang, B. Sun, L. Wang and X. Guo, *Microchimica Acta*, 2025, 192, 77.
